# Supplementary material
Source: PubMed Central journal article supplement (PMC7612782)
Supplement: EMS140747-supplement-Supplementary_Information.pdf [file EMS140747-supplement-Supplementary_Information.pdf]

# 1 **Supplementary Methods**

## 2 EEG source analysis

### 3 *Head and forward models*

4 For each recording session and participant, electrode positions were measured with a Polhemus  
5 FASTRAK system (Polhemus Inc.). We aligned the electrode locations to the standardized  
6 electrode positions from the standard\_1020.elc template in MNI space and projected them onto  
7 scalp surface according to FieldTrip procedures. Leadfields were constructed to define the  
8 mapping from an 8 mm resolution grid for source activities to EEG scalp electrodes based on  
9 a standardized 3-layer boundary element model of the Colin27 brain<sup>1</sup> separately for each  
10 recording session.

### 11 *EEG source localization*

12  
13 EEG data were lowpass filtered to 28 Hz and downsampled to 64 Hz. For each recording  
14 session and participant, pre-stimulus EEG from -0.6 to -0.1 s from all conditions and post-  
15 stimulus data from 0.1 to 0.3 s from unisensory 1-flash and 2-flash trials (to focus on visual  
16 activity) were concatenated. We computed the corresponding covariance matrix and the spatial  
17 filter coefficients of the linearly constrained minimum variance (LCMV) beamformer<sup>2</sup> as  
18 implemented in the FieldTrip toolbox<sup>3</sup> (with regularization parameter lambda = '5%').

19 We projected the 28 Hz lowpass-filtered EEG signal of each trial (-1.2 to 0.7 s) into  
20 source space through these spatial filters. The dimensionality of the 3-coordinate spatial filters  
21 was reduced to a single orientation that maximizes the filter output (FieldTrip parameter  
22 fixedori = true).

### 23 *ROI definition*

24  
25 We defined our region of interest in source space by combining anatomical and functional  
26 constraints. First, our regions of interest were constrained to V1v, V1d, V2v, V2d, V3v, V3d,  
27 hV4, VO1, VO2, PHC1, PHC2, MST, hMT, LO2, LO1, V3a, V3b in the right hemisphere (i.e.  
28 contralateral to the flash) based on functional probabilistic maps<sup>4</sup>. Second, we included grid  
29 points with significant (p<0.05 uncorrected) 'post-stimulus source power' as defined by the  
30 following contrast (see Supplementary Figure 7 for post-stimulus source power overlaid on  
31 brain sections):

$$32 \text{ poststimulus source power} = \frac{\text{Var}_{\text{post}[100\text{ms},300\text{ms}]} - \text{Var}_{\text{pre}[-600\text{ms},-100\text{ms}]}}{\text{Var}_{\text{pre}[-600\text{ms},-100\text{ms}]}}$$

33  
34 Within this mask, we included the 5% voxels with the greatest post-stimulus power and  
35 identified the brain source grid points that were within 1 cm distance from the geometric mean  
36 of this ROI. This procedure yielded seven grid points as our final ROI.

### 37 *Extraction of source activity from ROI and Alpha frequency analysis*

38 We extracted the source activity for each trial from -0.6 to 0.3 s from those seven grid points.  
39 In Supplementary Figure 7, we show the timecourse of the first eigenvariate across time and  
40 sessions (averaged across trials and participants) together with the grand average pooled over  
41 O2, PO4, PO8. Because the sign of the first eigenvariate of source activity is not meaningful,  
42 we used the sign for each participant that minimized the mean square error with respect to the  
43 grand average across electrodes. As shown in the figure, the timecourses of source and sensor  
44 activity are well in correspondence, which validates our source analysis and ROI definition.  
45 For the 7 grid points in the ROI, we extracted the source activity for each trial from -1.2 to  
46 0.7 s and performed the frequency sliding (within subject) analysis and individual alpha peak  
47 estimation (between subject) using the methodological procedures as described for the sensor  
48 analysis in the main paper.



51 **Within-participant results in source space: Effects of alpha frequency on  $d'$  and**  
52  **$Bias_{centre}$**

53 We repeated our analyses in source space to focus on alpha sources in occipital cortices  
54 (Supplementary methods 1, Supplementary Figures 2 and 3, Supplementary Tables 10-12). Out  
55 of these 30 tests, two were significant in the source space analysis. In the time-collapsed  
56 analysis, we observed a significant effect of alpha frequency on  $d'$  both for t-test p-values and  
57 Bayes factors. However, the effect was in the opposite direction than predicted by the alpha  
58 temporal resolution hypothesis with greater  $d'$  for lower alpha frequency (0 sound condition,  
59 time collapsed:  $t_{20} = 3.286$ ,  $p = 0.004$ ,  $d = 0.270$ , 95%  $CI = [0.092, 0.416]$ ,  $BF = 11.357$ ).  
60 Moreover, this effect was observed only for the 'yes-no SOA', but not for the 'yes-no  
61 threshold' experiment. Further, in the time-resolved analysis, we observed a brief effect in the  
62 expected direction in the 'yes-no' experiment for the 1 sound condition (time resolved:  $p =$   
63  $0.015$ ). But this effect was again not replicated in the 'yes-no threshold' experiment  
64 (Supplementary Figure 2, Supplementary Table 10). We did not observe any effect of pre-  
65 stimulus alpha frequency on bias. Further, the effects did not correlate between the two  
66 experiments across participants.

67  
68 **The effect of alpha frequency at high and low pre-stimulus alpha power**

69 We also assessed whether effects of alpha frequency may depend on alpha power.  
70 Hence, we repeated the time-collapsed frequency analysis separately for low and high alpha  
71 power trials. There was no significant alpha frequency effect on  $d'$  for high or low alpha power  
72 with most tests showing substantial evidence for the null hypothesis (Supplementary Table 8).  
73 We observed two significant alpha frequency effects on  $Bias_{centre}$  in the low power group for  
74 the 'yes-no' 0-sound ( $t_{20} = -3.729$ ,  $p = 0.001$ ,  $d = 0.287$ , 95%  $CI = [-0.275, -0.077]$ ) and 2-  
75 sound ( $t_{20} = 2.897$ ,  $p = 0.009$ ,  $d = 0.160$ , 95%  $CI = [0.036, 0.225]$ ) conditions. However, both  
76 effects were opposite to the direction of the alpha temporal resolution hypothesis  
77 (Supplementary Table 9).

78  
79 **The effect of pre-stimulus alpha power on  $d'$  and  $Bias_{centre}$**

80 Because alpha frequency and power are intimately related<sup>5,6</sup>, we also assessed the role  
81 of pre-stimulus alpha power on  $d'$  and  $Bias_{centre}$ . Pre-stimulus alpha power did not significantly  
82 affect perceptual sensitivity in any of the sensory contexts. We observed a significantly  
83 stronger bias for low relative to high alpha power in the 'one sound' context of the 'yes-no  
84 threshold' experiment (Supplementary Figure 6).

85  
86 **Comparing pre-stimulus alpha frequency for one and two flash perceptual outcomes**

87 Following previous work<sup>7</sup> we also directly compared pre-stimulus alpha frequency for  
88 trials with 'one flash' and 'two flash' perceptual outcomes (Supplementary Figure 5). Again,  
89 this analysis did not reveal any significant effects.

90 **Supplementary Tables**

91 **Behavioural analyses**

92 **Supplementary Table 1. Number of trials for within subject analyses of sensitivity and**  
 93 **bias.**

|                  | <b>0 sounds</b>     | <b>1 sound</b>      | <b>2 sounds</b>    |
|------------------|---------------------|---------------------|--------------------|
| Yes-no SOA       |                     |                     |                    |
| 1 flash          | 599.5 ± 15.87 SEM   | 613.5 ± 17.35 SEM   | 306.7 ± 8.578 SEM  |
| 2 flashes        | 297.45 ± 8.19 SEM   | 304.85 ± 8.925 SEM  | 308 ± 8.535 SEM    |
| Yes-no threshold |                     |                     |                    |
| 1 flash          | 456.7 ± 14.994 SEM  | 461.45 ± 14.4 SEM   | 460.8 ± 14.12 SEM  |
| 2 flashes        | 461.65 ± 14.457 SEM | 464.05 ± 14.619 SEM | 463.9 ± 15.063 SEM |

94 SEM, standard error of the mean

95

96

97

98 **Supplementary Table 2. Behavioral performance accuracy in the ‘yes-no SOA’ and ‘yes-**  
 99 **no threshold’ experiments for none, one and two sound contexts.**

|                  | <b>0 sounds</b> | <b>1 sound</b>  | <b>2 sounds</b> |
|------------------|-----------------|-----------------|-----------------|
| Yes-no SOA       |                 |                 |                 |
| 1 flash          | 0.91 ± 0.02 SEM | 0.96 ± 0.01 SEM | 0.50 ± 0.07 SEM |
| 2 flashes        | 0.63 ± 0.05 SEM | 0.52 ± 0.05 SEM | 0.84 ± 0.04 SEM |
| Yes-no threshold |                 |                 |                 |
| 1 flash          | 0.85 ± 0.03 SEM | 0.92 ± 0.02 SEM | 0.48 ± 0.06 SEM |
| 2 flashes        | 0.45 ± 0.04 SEM | 0.44 ± 0.04 SEM | 0.81 ± 0.05 SEM |

100 SEM, standard error of the mean

101

102

103 **Supplementary Table 3. Statistical comparisons of  $d'$  and  $Bias_{centre}$  between auditory**  
 104 **contexts in the ‘yes-no SOA’ experiment for intermediate SOAs (cf. Figure 1c).**

|                 | <b>0 vs 1 sound</b> |           |          | <b>0 vs 2 sounds</b> |           |          | <b>1 vs 2 sounds</b> |           |          |
|-----------------|---------------------|-----------|----------|----------------------|-----------|----------|----------------------|-----------|----------|
|                 | <b>N</b>            | <b>t</b>  | <b>d</b> | <b>N</b>             | <b>t</b>  | <b>d</b> | <b>N</b>             | <b>t</b>  | <b>d</b> |
| $d'$            | 20                  | -1.667    | -0.124   | 20                   | 3.796**   | 0.707    | 20                   | 4.528***  | 0.789    |
| $Bias_{centre}$ | 20                  | -5.193*** | -0.781   | 20                   | 10.240*** | 1.771    | 20                   | 12.831*** | 2.234    |

105 d, Cohen’s d. t, t-value.  $p < 0.05$  (\*),  $p < 0.01$  (\*\*),  $p < 0.001$  (\*\*\*)

106

107

108 **Supplementary Table 4. Pairwise correlations of perceptual threshold estimates**  
 109 **between experiments (cf. Supplementary Figure 7).**

|                                | <b>0 sounds</b> |          |                        | <b>1 sound</b> |          |                         | <b>2 sounds</b> |          |                     |
|--------------------------------|-----------------|----------|------------------------|----------------|----------|-------------------------|-----------------|----------|---------------------|
|                                | <b>N</b>        | <b>r</b> | <b>BF</b>              | <b>N</b>       | <b>r</b> | <b>BF</b>               | <b>N</b>        | <b>r</b> | <b>BF</b>           |
| 2IFC vs Yes-no SOA             | 20              | 0.592    | 7.259* <sup>A</sup>    | 19             | 0.802    | 785.368* <sup>A</sup>   | 19              | 0.501    | 1.869               |
| 2IFC vs Yes-no threshold       | 20              | 0.514    | 2.450                  | 19             | 0.713    | 57.949                  | 20              | -0.379   | 0.661               |
| Yes-no SOA vs Yes-no threshold | 20              | 0.823    | 2909.023* <sup>A</sup> | 20             | 0.874    | 42365.344* <sup>A</sup> | 19              | 0.199    | 0.243* <sup>0</sup> |

110 N, number of participants; r, Pearson correlation; BF, Bayes factor; BF < 1/3 (\*<sup>0</sup>), BF > 3 (\*<sup>A</sup>).

111 **Within subject alpha frequency analyses in sensor space**

112 **Supplementary Table 5. Sensor level analysis: Statistical comparison of  $d'$  for low vs.**  
 113 **high alpha frequency (time-collapsed, cf. Figure 2a).**

|                  | 0 sounds |       |                     | 1 sound |       |       | 2 sounds |        |                     |
|------------------|----------|-------|---------------------|---------|-------|-------|----------|--------|---------------------|
|                  | N        | t     | BF                  | N       | t     | BF    | N        | t      | BF                  |
| Yes-no SOA       | 20       | 1.057 | 0.380               | 20      | 1.012 | 0.365 | 20       | 1.471  | 0.588               |
| Yes-no threshold | 20       | 0.106 | 0.234* <sup>0</sup> | 20      | 1.341 | 0.506 | 20       | -0.106 | 0.234* <sup>0</sup> |

114 N, number of participants; t, t-value; BF, Bayes factor; BF < 1/3 (\*<sup>0</sup>). Positive t-values indicate  
 115 a larger  $d'$  for low relative to high alpha frequency.

116  
 117

118 **Supplementary Table 6. Sensor level analysis: Statistical comparison of  $Bias_{centre}$  for low**  
 119 **vs. high alpha frequency (time-collapsed, cf. Figure 3a).**

|                  | 0 sounds |        |       | 1 sound |       |                     | 2 sounds |       |                     |
|------------------|----------|--------|-------|---------|-------|---------------------|----------|-------|---------------------|
|                  | N        | t      | BF    | N       | t     | BF                  | N        | t     | BF                  |
| Yes-no SOA       | 20       | -1.151 | 0.415 | 20      | 0.237 | 0.238* <sup>0</sup> | 20       | 0.610 | 0.275* <sup>0</sup> |
| Yes-no threshold | 20       | -0.944 | 0.345 | 20      | 0.235 | 0.238* <sup>0</sup> | 20       | 1.705 | 0.793               |

120 N, number of participants; t, t-value; BF, Bayes factor; BF < 1/3 (\*<sup>0</sup>). Positive t-values indicate  
 121 a larger  $Bias_{centre}$  for low relative to high alpha frequency.

122  
 123

124 **Supplementary Table 7. Sensor level analysis: Consistency of alpha frequency effects**  
 125 **across experiments for  $d'$  and  $Bias_{centre}$  (time-collapsed, cf. Figure 2b, Figure 3b).**

|                 | 0 sounds |        |                     | 1 sound |         |                     | 2 sounds |        |                     |
|-----------------|----------|--------|---------------------|---------|---------|---------------------|----------|--------|---------------------|
|                 | N        | r      | BF                  | N       | r       | BF                  | N        | r      | BF                  |
| $d'$            | 20       | -0.219 | 0.262* <sup>0</sup> | 20      | 0.067   | 0.177* <sup>0</sup> | 20       | -0.098 | 0.186* <sup>0</sup> |
| $Bias_{centre}$ | 20       | 0.319  | 0.435               | 20      | 0.569** | 5.102* <sup>A</sup> | 20       | 0.529* | 2.973               |

126 N, number of participants; r, Pearson's correlation coefficient;  $p < 0.05$  (\*),  $p < 0.01$  (\*\*),  $p <$   
 127  $0.001$  (\*\*\*) ; BF, Bayes factor; BF < 1/3 (\*<sup>0</sup>), BF > 3 (\*<sup>A</sup>).

128  
 129  
 130



131 **Supplementary Table 8. Sensor level analysis: Statistical comparison of  $d'$  for pre-**  
 132 **stimulus low and high alpha frequency (time-collapsed), separately for low and high**  
 133 **alpha power trials (time-collapsed analysis).**

|            |                  | 0 sounds |        |                     | 1 sound |         |                     | 2 sounds |        |                     |
|------------|------------------|----------|--------|---------------------|---------|---------|---------------------|----------|--------|---------------------|
|            |                  | N        | t      | BF                  | N       | t       | BF                  | N        | t      | BF                  |
| High power | Yes-no SOA       | 20       | -0.174 | 0.235* <sup>0</sup> | 20      | 0.457   | 0.255* <sup>0</sup> | 20       | 0.216  | 0.237* <sup>0</sup> |
|            | Yes-no threshold | 20       | 1.817  | 0.924               | 20      | -0.564  | 0.268* <sup>0</sup> | 20       | 0.265  | 0.240* <sup>0</sup> |
| Low power  | Yes-no SOA       | 20       | -0.903 | 0.334               | 20      | -2.249* | 1.778               | 20       | 0.444  | 0.254* <sup>0</sup> |
|            | Yes-no threshold | 20       | -0.270 | 0.240* <sup>0</sup> | 20      | -0.860  | 0.323* <sup>0</sup> | 20       | -0.044 | 0.233* <sup>0</sup> |

134 N, number of participants; t, t-value;  $p < 0.05$  (\*),  $p < 0.01$  (\*\*),  $p < 0.001$  (\*\*\*); BF, Bayes  
 135 factor; BF  $< 1/3$  (\*<sup>0</sup>). Positive t-values indicate a larger  $d'$  for low relative to high alpha  
 136 frequency.  
 137  
 138

139 **Supplementary Table 9. Sensor level analysis: Statistical comparison of  $Bias_{centre}$  for**  
 140 **pre-stimulus low and high alpha frequency (time-collapsed), separately for low and high**  
 141 **alpha power trials (median split).**

|            |                  | 0 sounds |          |                      | 1 sound |        |        | 2 sounds |         |                     |
|------------|------------------|----------|----------|----------------------|---------|--------|--------|----------|---------|---------------------|
|            |                  | N        | t        | BF                   | N       | t      | BF     | N        | t       | BF                  |
| High power | Yes-no SOA       | 20       | 1.200    | 0.435                | 20      | 0.057  | 0.233* | 20       | -0.469  | 0.257* <sup>0</sup> |
|            | Yes-no threshold | 20       | 0.241    | 0.239* <sup>0</sup>  | 20      | -1.337 | 0.504  | 20       | -1.535  | 0.636               |
| Low power  | Yes-no SOA       | 20       | -3.729** | 26.910* <sup>A</sup> | 20      | -0.453 | 0.255* | 20       | 2.897** | 5.471* <sup>A</sup> |
|            | Yes-no threshold | 20       | -1.466   | 0.585                | 20      | -1.668 | 0.754  | 20       | -1.304  | 0.486               |

142 N, number of participants; t, t-value;  $p < 0.05$  (\*),  $p < 0.01$  (\*\*),  $p < 0.001$  (\*\*\*); BF, Bayes  
 143 factor; BF  $< 1/3$  (\*<sup>0</sup>), BF  $> 3$  (\*<sup>A</sup>). A positive t-value indicates a larger  $Bias_{centre}$  for low relative  
 144 to high alpha frequency.

145 **Within subject alpha frequency analyses in source space**

146 **Supplementary Table 10. Source level analysis: Statistical comparison of  $d'$  for low vs.**  
 147 **high alpha frequency (time-collapsed, cf. Supplementary Figure 2a).**

|                  | 0 sounds |         |                      | 1 sound |        |       | 2 sounds |       |                     |
|------------------|----------|---------|----------------------|---------|--------|-------|----------|-------|---------------------|
|                  | N        | t       | BF                   | N       | t      | BF    | N        | t     | BF                  |
| Yes-no SOA       | 20       | 3.286** | 11.357* <sup>A</sup> | 20      | -1.450 | 0.574 | 20       | 0.317 | 0.243* <sup>0</sup> |
| Yes-no threshold | 20       | 1.163   | 0.420                | 20      | -0.942 | 0.344 | 20       | 0.968 | 0.352               |

148 N, number of participants; t, t-value;  $p < 0.05$  (\*),  $p < 0.01$  (\*\*),  $p < 0.001$  (\*\*\*) ; BF, Bayes  
 149 factor;  $BF < 1/3$  (\*<sup>0</sup>),  $BF > 3$  (\*<sup>A</sup>). Positive t-values indicate a larger  $d'$  for low relative to high  
 150 alpha frequency.

151  
 152

153 **Supplementary Table 11. Source level analysis: Statistical comparison of  $Bias_{centre}$  for**  
 154 **low vs. high alpha frequency (time-collapsed, cf. Supplementary Figure 3a).**

|                  | 0 sounds |        |                     | 1 sound |        |                     | 2 sounds |        |                     |
|------------------|----------|--------|---------------------|---------|--------|---------------------|----------|--------|---------------------|
|                  | N        | t      | BF                  | N       | t      | BF                  | N        | t      | BF                  |
| Yes-no SOA       | 20       | -0.123 | 0.234* <sup>0</sup> | 20      | 0.098  | 0.233* <sup>0</sup> | 20       | 0.819  | 0.313* <sup>0</sup> |
| Yes-no threshold | 20       | 1.371  | 0.524               | 20      | -0.026 | 0.232* <sup>0</sup> | 20       | -0.727 | 0.294* <sup>0</sup> |

155 N, number of participants; t, t-value; BF, Bayes factor;  $BF < 1/3$  (\*<sup>0</sup>). Positive t-values indicate  
 156 a larger  $Bias_{centre}$  for low relative to high alpha frequency.

157  
 158

159 **Supplementary Table 12. Source level analysis: Consistency of alpha frequency effects**  
 160 **across experiments for  $d'$  and  $Bias_{centre}$  (time-collapsed, cf. Supplementary Figures 2b,**  
 161 **3b).**

|                 | 0 sounds |       |       | 1 sound |       |                     | 2 sounds |       |                     |
|-----------------|----------|-------|-------|---------|-------|---------------------|----------|-------|---------------------|
|                 | N        | r     | BF    | N       | r     | BF                  | N        | r     | BF                  |
| $d'$            | 20       | 0.311 | 0.414 | 20      | 0.236 | 0.281* <sup>0</sup> | 20       | 0.267 | 0.327* <sup>0</sup> |
| $Bias_{centre}$ | 20       | 0.348 | 0.524 | 20      | 0.465 | 1.423               | 20       | 0.134 | 0.200* <sup>0</sup> |

162 N, number of participants; r, Pearson's correlation coefficient; BF, Bayes factor;  $BF < 1/3$  (\*<sup>0</sup>).

163 **Between subject alpha frequency analyses in sensor space**

164 **Supplementary Table 13. Sensor level analysis: Correlation between trait alpha peak**  
 165 **frequency and perceptual window size**

| Threshold definition | Eyes-closed sensor level |       |                    | Pre-stimulus sensor level |       |                    |
|----------------------|--------------------------|-------|--------------------|---------------------------|-------|--------------------|
|                      | N                        | r     | BF                 | N                         | r     | BF                 |
| 2IFC                 |                          |       |                    |                           |       |                    |
| 1F & 2F              | 20                       | 0.22  | 0.26* <sup>0</sup> | 20                        | 0.31  | 0.41               |
| 1F1S & 2F1S          | 19                       | -0.14 | 0.21* <sup>0</sup> | 19                        | -0.08 | 0.19* <sup>0</sup> |
| 1F2S & 2F2S          | 20                       | 0.20  | 0.24* <sup>0</sup> | 20                        | 0.17  | 0.22* <sup>0</sup> |
| Yes-no SOA           |                          |       |                    |                           |       |                    |
| 1F & 2F              | 20                       | -0.31 | 0.42               | 20                        | -0.19 | 0.24* <sup>0</sup> |
| 1F1S & 2F1S          | 20                       | -0.25 | 0.29* <sup>0</sup> | 20                        | -0.13 | 0.20* <sup>0</sup> |
| 1F2S & 2F2S          | 19                       | 0.002 | 0.17* <sup>0</sup> | 19                        | 0.20  | 0.24* <sup>0</sup> |
| Staircase SOA        |                          |       |                    |                           |       |                    |
| 2F                   | 20                       | -0.16 | 0.21* <sup>0</sup> | 20                        | -0.21 | 0.25* <sup>0</sup> |
| 2F1S                 | 20                       | -0.08 | 0.18* <sup>0</sup> | 20                        | -0.17 | 0.22* <sup>0</sup> |
| 1F2S                 | 20                       | -0.33 | 0.46               | 20                        | -0.13 | 0.20* <sup>0</sup> |

166 N, number of participants; r, Pearson's correlation coefficient; BF, Bayes factor; BF < 1/3 (\*<sup>0</sup>).  
 167  
 168

169 **Supplementary Table 14. Sensor level analysis for electrodes contralateral to flash**  
 170 **stimulus: Correlation between trait alpha peak frequency and perceptual window size**  
 171 **(i.e. threshold).**

| Threshold definition | Pre-stimulus sensor level |        |                     | Eyes-closed sensor level |        |                     |
|----------------------|---------------------------|--------|---------------------|--------------------------|--------|---------------------|
|                      | N                         | r      | BF                  | N                        | r      | BF                  |
| 2IFC                 |                           |        |                     |                          |        |                     |
| 1F & 2F              | 20                        | 0.264  | 0.321* <sup>0</sup> | 20                       | 0.123  | 0.195* <sup>0</sup> |
| 1F1S & 2F1S          | 19                        | -0.014 | 0.175* <sup>0</sup> | 19                       | -0.128 | 0.200* <sup>0</sup> |
| 1F2S & 2F2S          | 20                        | 0.097  | 0.185* <sup>0</sup> | 20                       | 0.195  | 0.239* <sup>0</sup> |
| Yes-no SOA           |                           |        |                     |                          |        |                     |
| 1F & 2F              | 20                        | -0.155 | 0.211* <sup>0</sup> | 20                       | -0.453 | 1.255               |
| 1F1S & 2F1S          | 20                        | -0.138 | 0.202* <sup>0</sup> | 20                       | -0.355 | 0.553               |
| 1F2S & 2F2S          | 19                        | 0.084  | 0.185* <sup>0</sup> | 19                       | 0.051  | 0.178* <sup>0</sup> |
| Staircase SOA        |                           |        |                     |                          |        |                     |
| 2F                   | 20                        | -0.090 | 0.183* <sup>0</sup> | 20                       | -0.226 | 0.269* <sup>0</sup> |
| 2F1S                 | 20                        | -0.090 | 0.183* <sup>0</sup> | 20                       | -0.158 | 0.213* <sup>0</sup> |
| 1F2S                 | 20                        | -0.068 | 0.178* <sup>0</sup> | 20                       | -0.278 | 0.344               |

172 N, number of participants; r, Pearson's correlation coefficient; BF, Bayes factor; BF < 1/3 (\*<sup>0</sup>).

173 **Between subject alpha frequency analyses in source space**

174 **Supplementary Table 15. Source level analysis: Correlation between trait alpha peak**  
 175 **frequency and perceptual window size (cf. Supplementary Figure 4).**

| Threshold definition | Source level |       |                    |
|----------------------|--------------|-------|--------------------|
|                      | N            | r     | BF                 |
| 2IFC                 |              |       |                    |
| 1F & 2F              | 18           | -0.31 | 0.40               |
| 1F1S & 2F1S          | 17           | -0.31 | 0.39               |
| 1F2S & 2F2S          | 18           | 0.04  | 0.18* <sup>0</sup> |
| Yes-no SOA           |              |       |                    |
| 1F & 2F              | 18           | -0.41 | 0.77               |
| 1F1S & 2F1S          | 18           | -0.39 | 0.65               |
| 1F2S & 2F2S          | 17           | -0.09 | 0.19* <sup>0</sup> |
| Staircase SOA        |              |       |                    |
| 2F                   | 18           | -0.10 | 0.19* <sup>0</sup> |
| 2F1S                 | 18           | -0.23 | 0.27* <sup>0</sup> |
| 1F2S                 | 18           | -0.04 | 0.18* <sup>0</sup> |

176 N, number of participants; r, Pearson's correlation coefficient; BF, Bayes factor; BF < 1/3 (\*<sup>0</sup>).

177 **Supplementary References**

- 178 1. Holmes, C. J. *et al.* Enhancement of MR Images Using Registration for Signal  
179 Averaging. *J. Comput. Assist. Tomogr.* **22**, 324–333 (1998).
- 180 2. Van Veen, B. D., Van Drongelen, W., Yuchtman, M. & Suzuki, A. Localization of brain  
181 electrical activity via linearly constrained minimum variance spatial filtering. *IEEE*  
182 *Trans. Biomed. Eng.* **44**, 867–880 (1997).
- 183 3. Oostenveld, R., Fries, P., Maris, E. & Schoffelen, J.-M. FieldTrip: Open Source Software  
184 for Advanced Analysis of MEG, EEG, and Invasive Electrophysiological Data.  
185 *Computational Intelligence and Neuroscience*  
186 <https://www.hindawi.com/journals/cin/2011/156869/> (2011) doi:10.1155/2011/156869.
- 187 4. Wang, L., Mruczek, R. E. B., Arcaro, M. J. & Kastner, S. Probabilistic Maps of Visual  
188 Topography in Human Cortex. *Cereb. Cortex N. Y. N 1991* **25**, 3911–3931 (2015).
- 189 5. Nelli, S., Itthipuripat, S., Srinivasan, R. & Serences, J. T. Fluctuations in instantaneous  
190 frequency predict alpha amplitude during visual perception. *Nat. Commun.* **8**, 2071  
191 (2017).
- 192 6. Jensen, O., Gips, B., Bergmann, T. O. & Bonnefond, M. Temporal coding organized by  
193 coupled alpha and gamma oscillations prioritize visual processing. *Trends Neurosci.* **37**,  
194 357–369 (2014).
- 195 7. Shen, L., Han, B., Chen, L. & Chen, Q. Perceptual inference employs intrinsic alpha  
196 frequency to resolve perceptual ambiguity. *PLOS Biol.* **17**, e3000025 (2019).
- 197
